# Supplementary material for: Protective Efficacy of a Mucosal Influenza Vaccine Formulation Based on the Recombinant Nucleoprotein Co-Administered with a TLR2/6 Agonist BPPcysMPEG
Source: MDPI journal article supplement (doi:10.3390/pharmaceutics15030912), 2023-03-10
Supplement: s1 [file s1]

# Supplementary Materials: Protective Efficacy of a mucosal Influenza Vaccine formulation based on the recombinant nucleoprotein co-administered with a TLR2/6 agonist BPPcysMPEG

Maria Victoria Sanchez, Thomas Ebensen, Kai Schulze, Diego Esteban Cargnelutti, Eduardo A. Scodeller and Carlos A. Guzmán

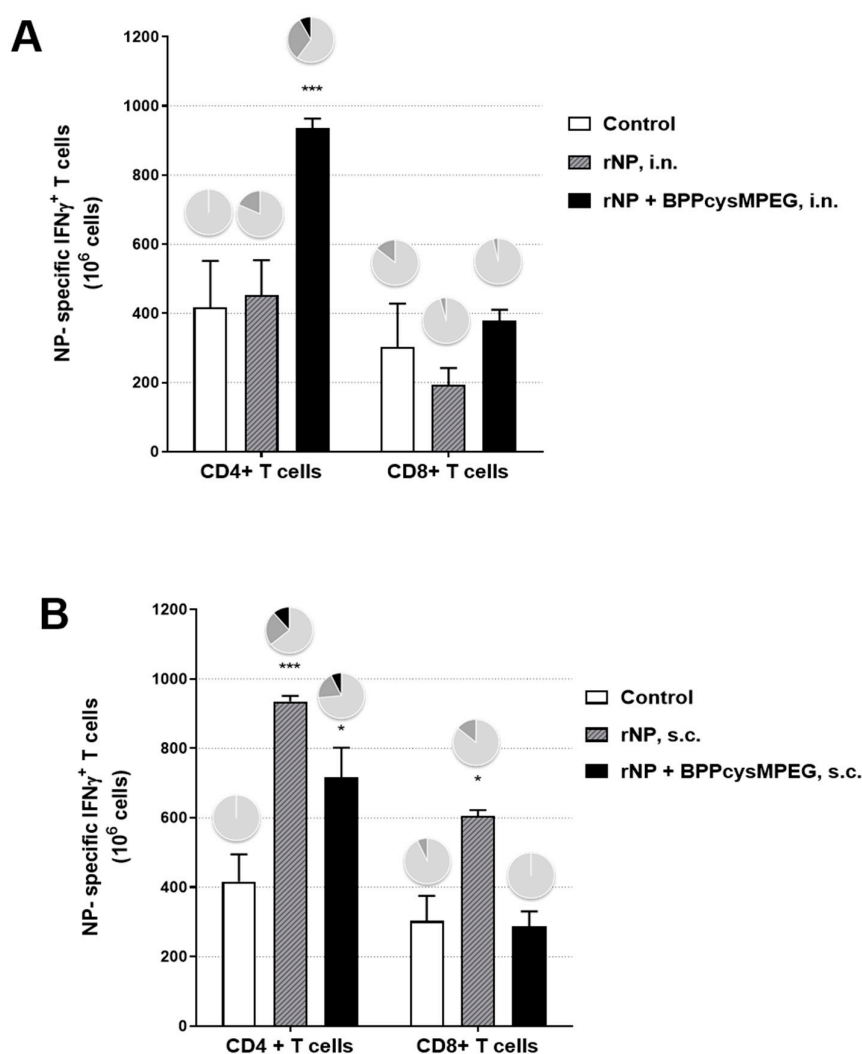

**Figure S1.** NP-specific multifunctional CD4<sup>+</sup> and CD8<sup>+</sup> T cell activity. The pie charts show the proportion of single (light grey), double (IFN $\gamma$ +TNF $\alpha$ +, IFN $\gamma$ +IL-2+; dark grey) and triple (IFN $\gamma$ +TNF $\alpha$ +IL-2+; black) cytokine producers; the bars represent the frequency (mean + SEM) of single IFN $\gamma$ + CD4<sup>+</sup> and CD8<sup>+</sup> T cells derived from mice vaccinated by (A) i.n. or (B) s.c. route. The number of unstimulated cells was subtracted from the respective number of stimulated cells. Statistical analysis between the adjuvanted and non-adjuvanted groups was performed by two-tailed Student's t-test and two-way ANOVA. Differences were statistically significant (\*,  $p < 0.1$ ; \*\*\*,  $p < 0.001$ ) with respect to values obtained in control mice and/or mice receiving rNP alone.

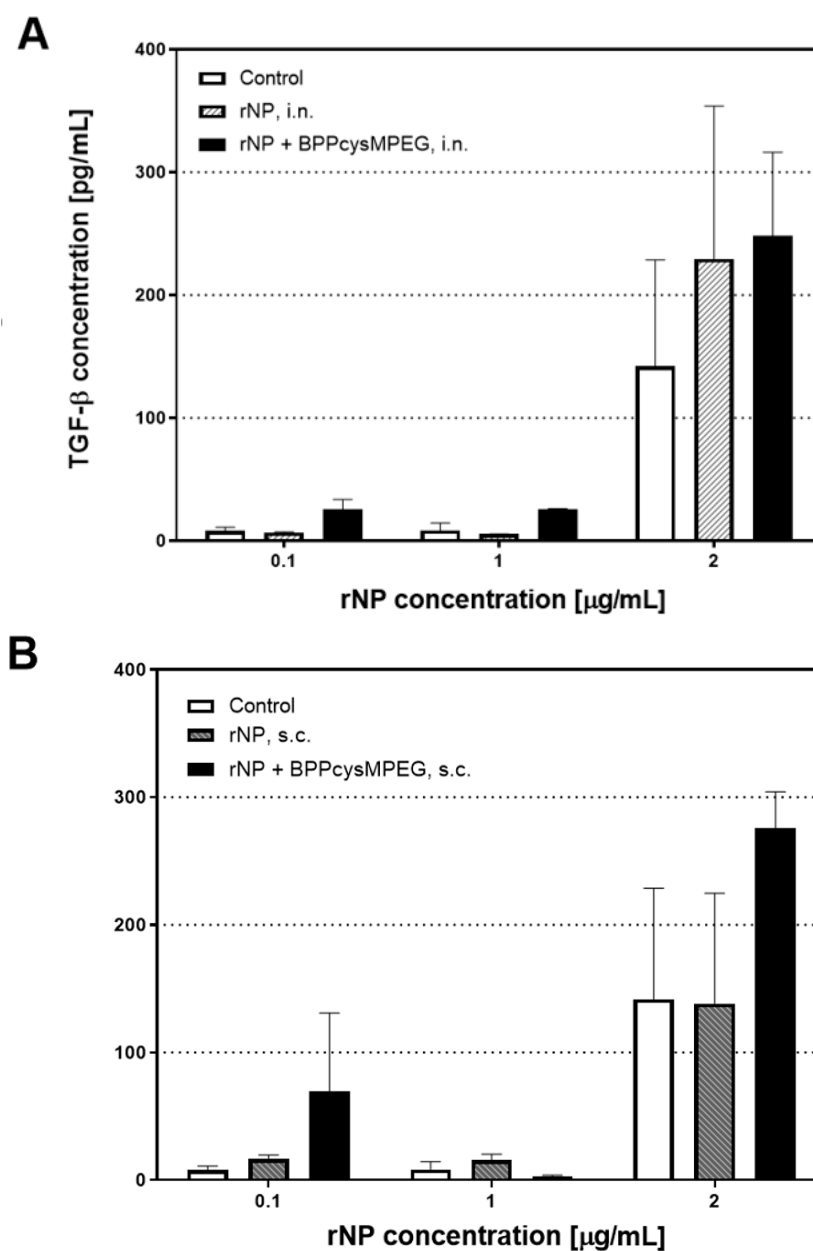

**Figure S2.** NP-specific TGF $\beta$  production. The presence of mouse TGF- $\beta$  was determined by an ELISA according to the manufacturer's instructions (eBioscience). (A) i.n. (B) s.c. SEM are indicated by vertical lines.

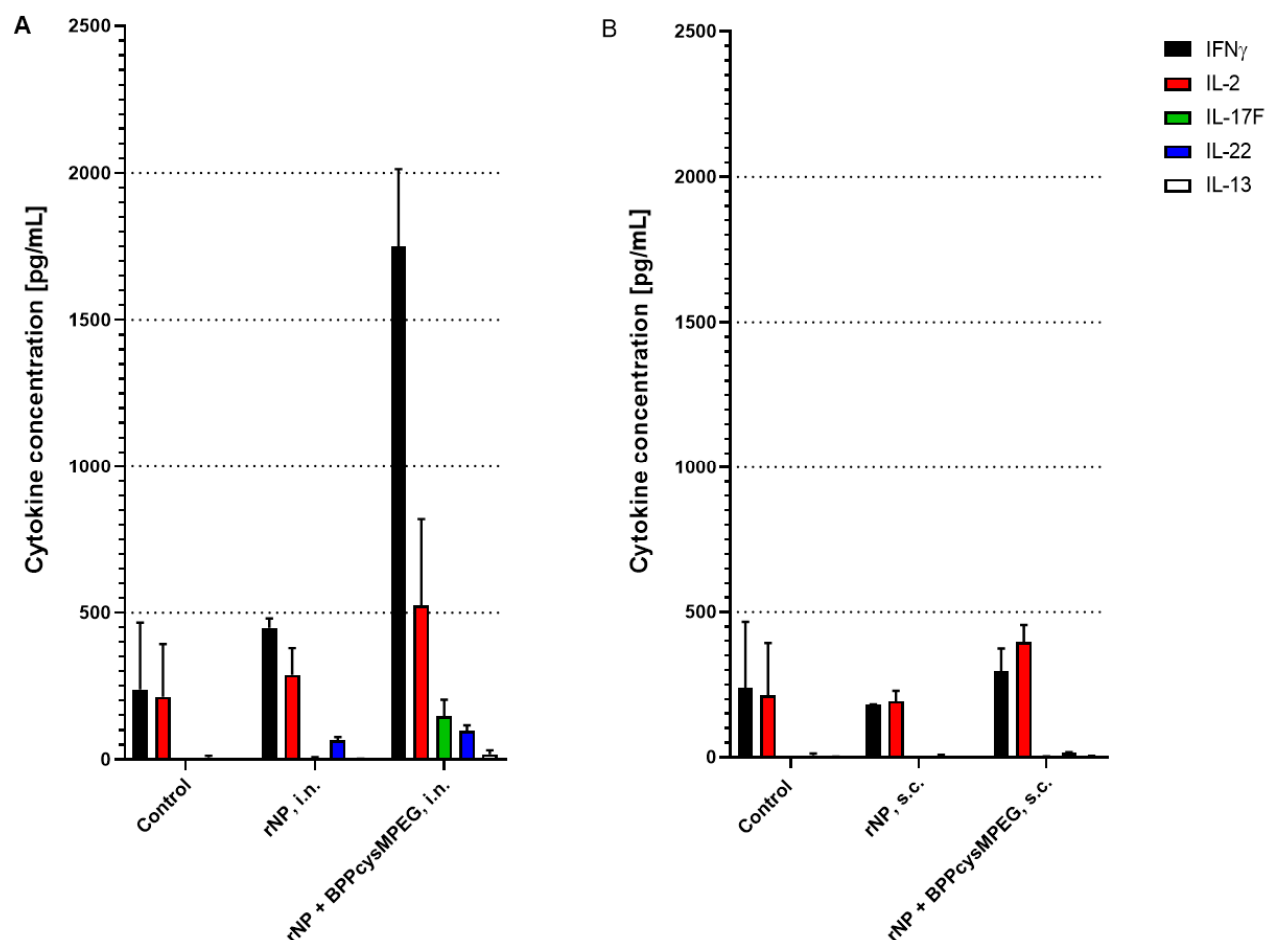

**Figure S3.** Cytokine profiles antigen-restimulated splenocytes derived from vaccinated mice. The presence of mouse IFN- $\gamma$ , IL-2, IL-13, IL-17F and IL-22 were determined using a cytometric bead array. Results are presented as cytokine concentration in [pg/mL] of Th1, Th2 and Th17 cytokines secreted by antigen-restimulated splenocytes derived from (A) mice vaccinated by i.n. and (B) by s.c. route.
